# Supplementary material for: Short-chain β-manno-oligosaccharides from copra meal: structural characterization, prebiotic potential and anti-glycation activity
Source: Royal Society of Chemistry journal article supplement (doi:10.1039/d2fo00013j), 2022-01-01

**Supplementary Table 1. U-HPLC analysis of CM- $\beta$ -MOS mixture generated from copra meal after ManB-1601 hydrolysis**

| <b>Peak Number</b> | <b>C-<math>\beta</math>-MOS (DP)</b> | <b>Retention Time (RT)</b> | <b>Area</b> | <b>Height</b> |
|--------------------|--------------------------------------|----------------------------|-------------|---------------|
| 1                  | 1                                    | 3.581                      | 39649       | 2933          |
| 2                  | 2                                    | 5.582                      | 1633884     | 57854         |
| 3                  | 2                                    | 6.398                      | 155683      | 17531         |
| 4                  | 3                                    | 8.138                      | 1389164     | 75617         |
| 5                  | 4                                    | 10.283                     | 1169958     | 59585         |

**DP: Degree of polymerization**

**Supplementary Table 2. Production of short chain fatty acids by *Lactobacillus* sp. in fermentation broth supplemented with CM-β-MOS mixture**

[illegible]

**Supplementary Figure 1:** Schematic representation of the copra meal  $\beta$ -mannan hydrolysis by ManB-1601

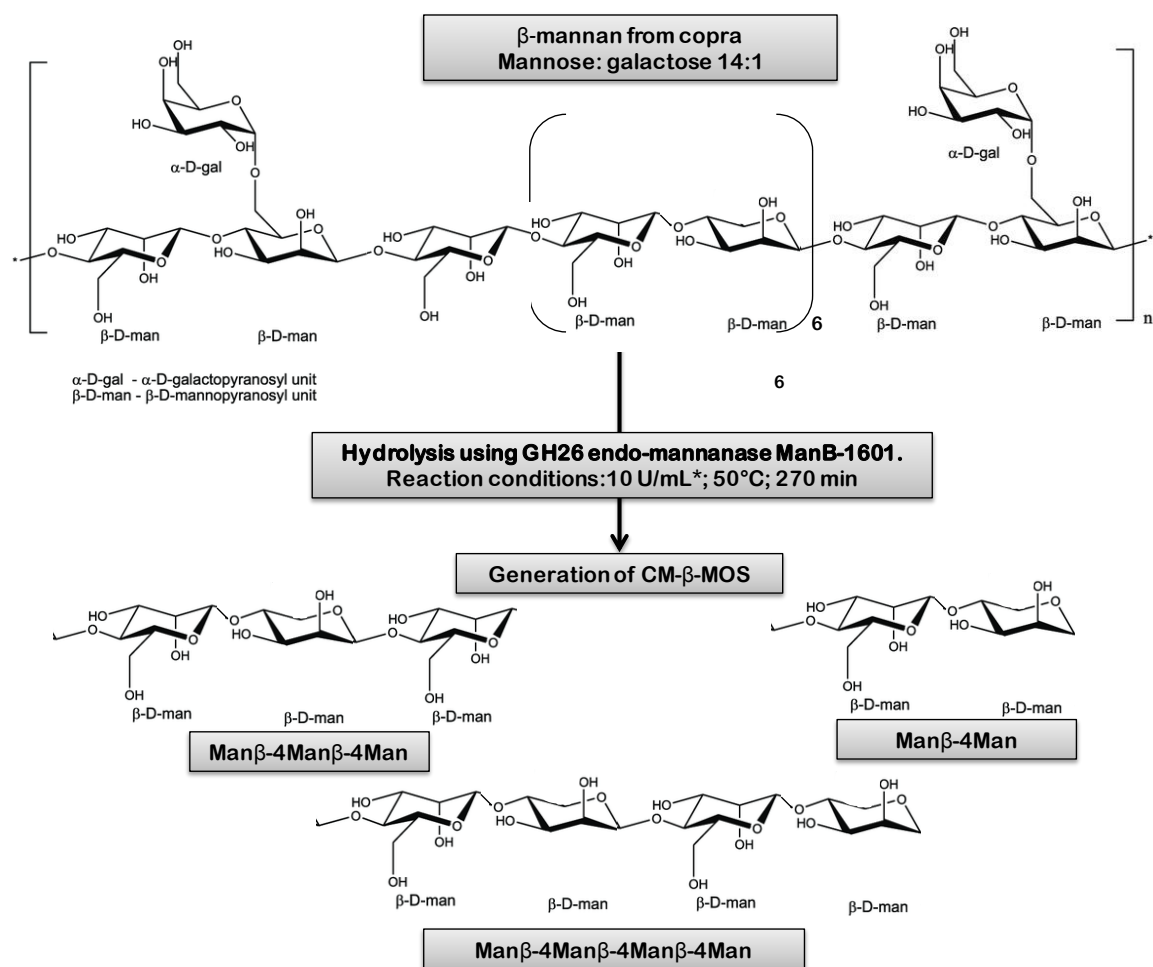

\* Further, increase in enzyme concentration (100 U/mL) marginally did not lead to corresponding increase in the oligosaccharide yield (0.3-fold higher; 334.5 mg/g substrate).

Supplementary Figure 2. (A) 1D  $^1\text{H}$ -NMR, (B) 1D  $^{13}\text{C}\{^1\text{H}\}$ -NMR and (C) 2D  $^1\text{H}$ - $^{13}\text{C}$  HMBC of DP2  
CM- $\beta$ -MOS CM- $\beta$ -MOS MOS

(A)

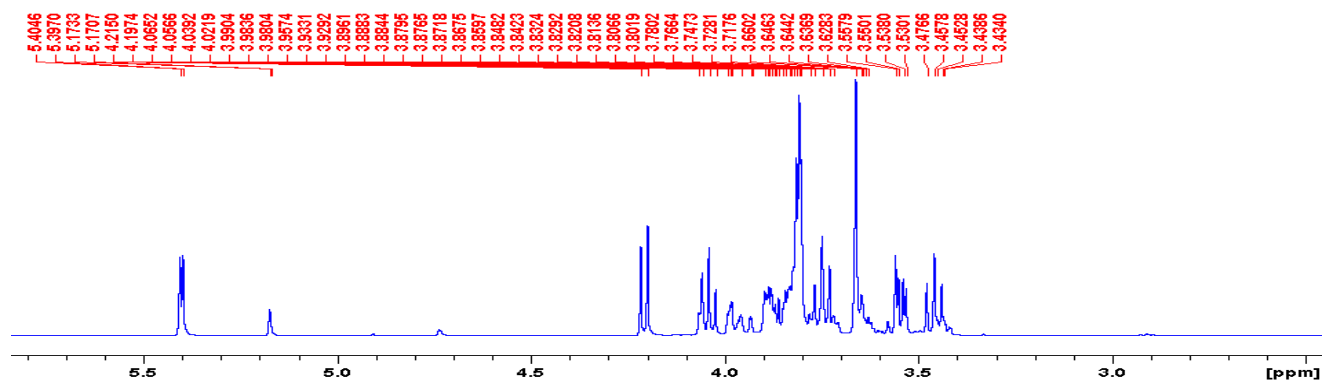

(B)

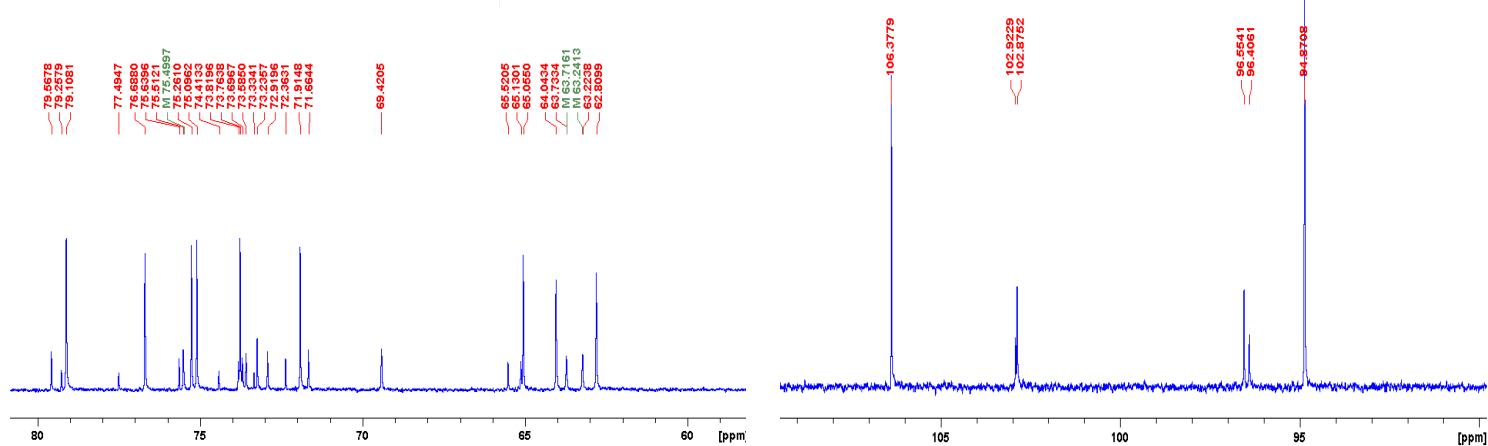

(C)

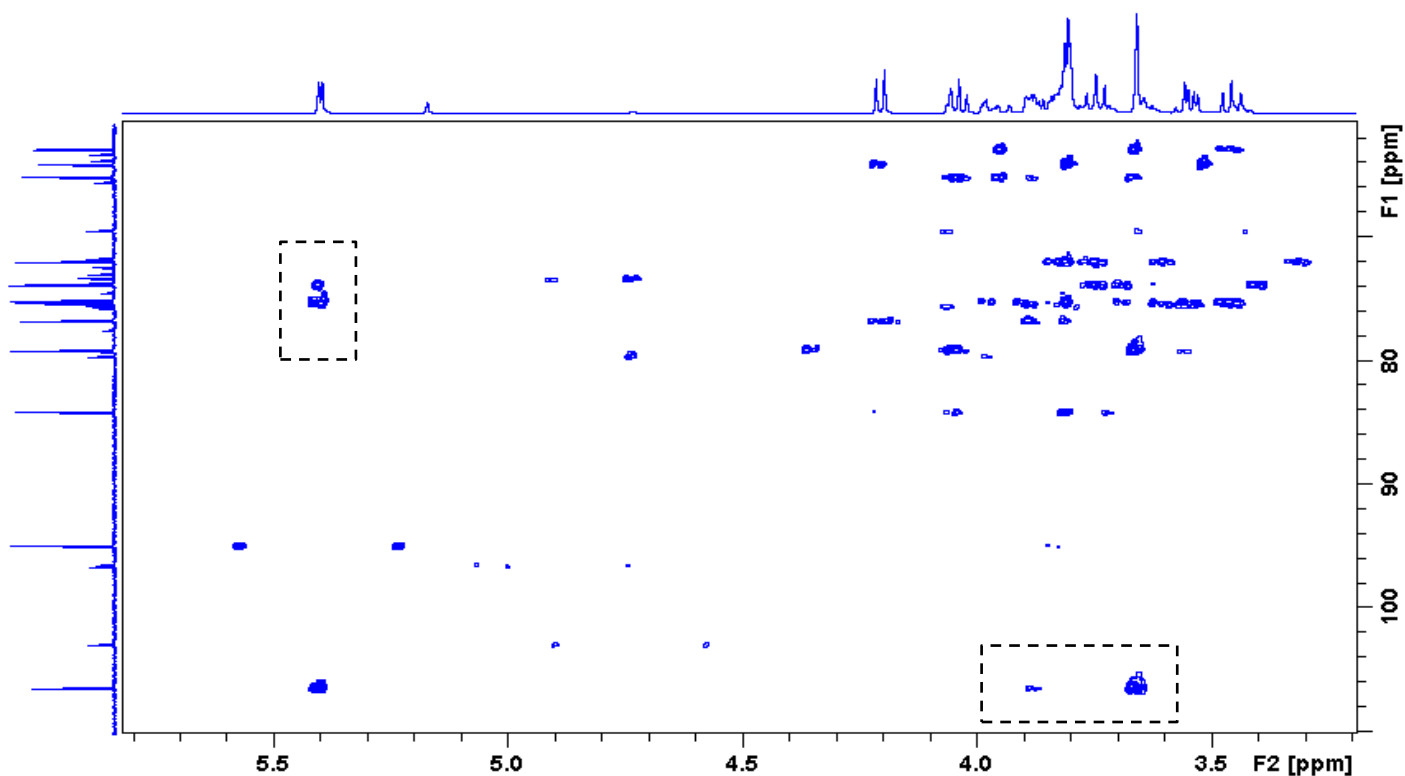

**Supplementary Figure 3. (A) 1D  $^1\text{H}$ -NMR, (B) 1D  $^{13}\text{C}\{^1\text{H}\}$ -NMR and (C) 2D  $^1\text{H}$ - $^{13}\text{C}$  HMBC of DP3 CM- $\beta$ -MOS CM- $\beta$ -MOS MOS**

**(A)**

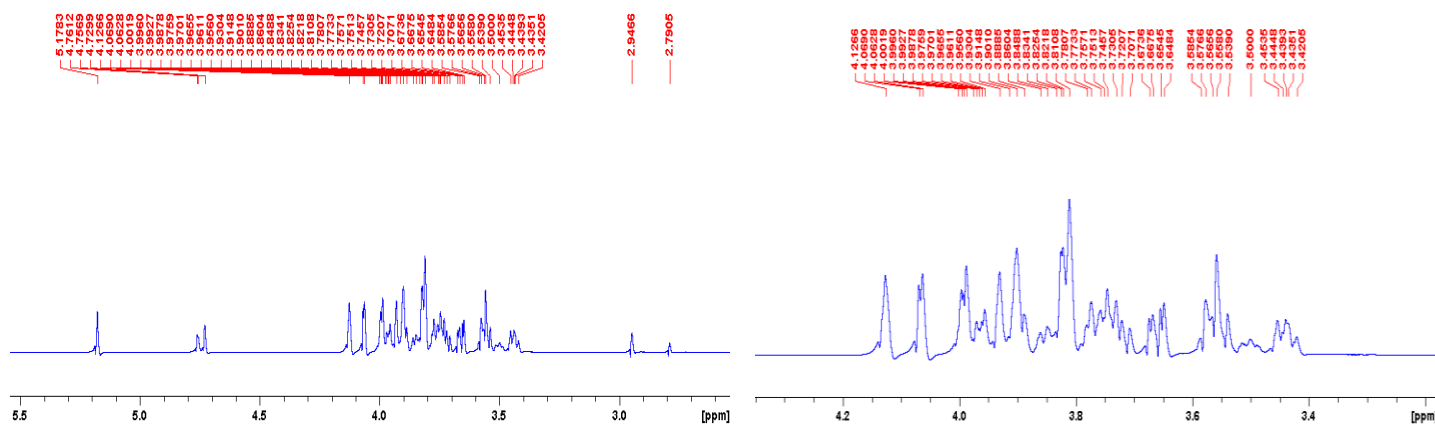

**(B)**

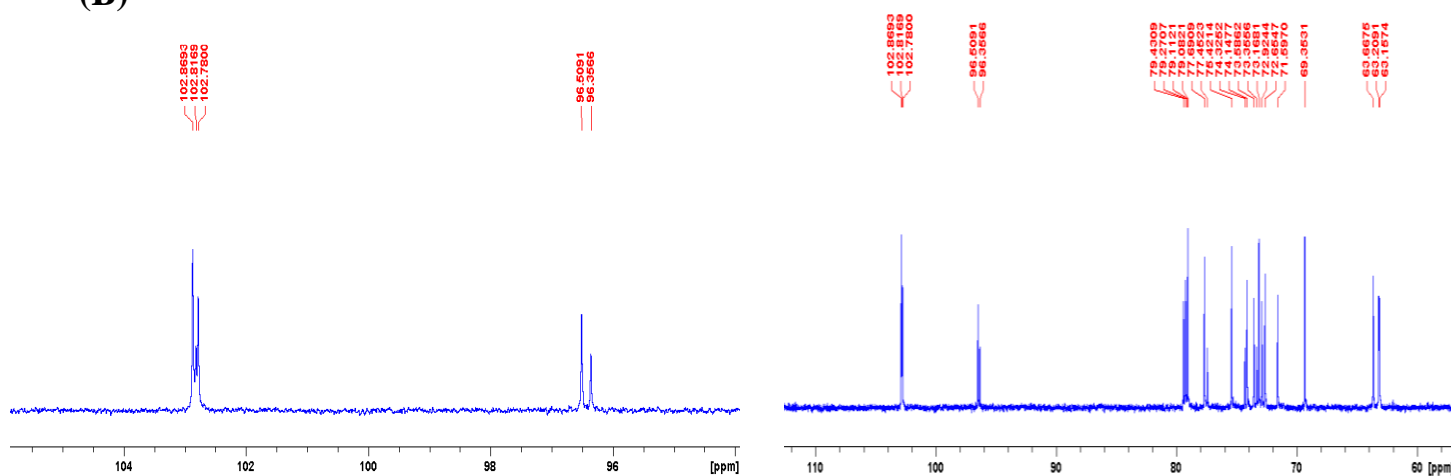

**(C)**

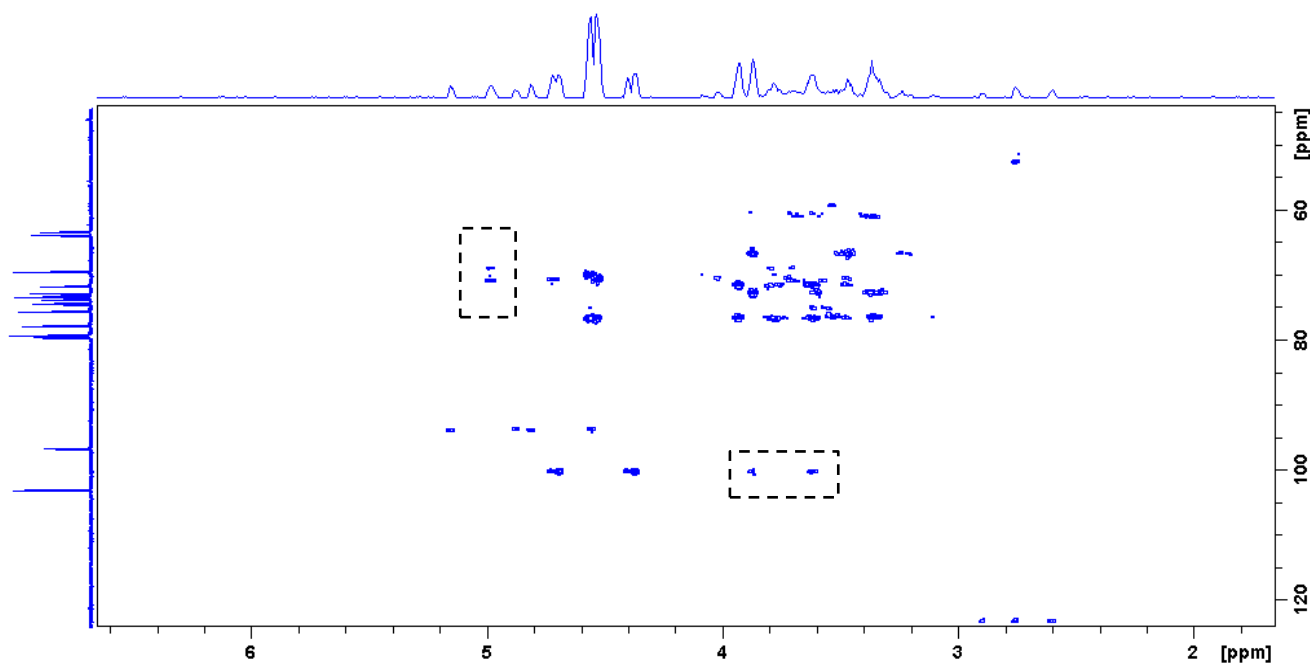

Supplementary Figure 4. (A) 1D  $^1\text{H}$ -NMR, (B) 1D  $^{13}\text{C}\{^1\text{H}\}$ -NMR and (C) 2D  $^1\text{H}$ - $^{13}\text{C}$  HMBC of DP4 CM- $\beta$ -MOS CM- $\beta$ -MOS MOS

(A)

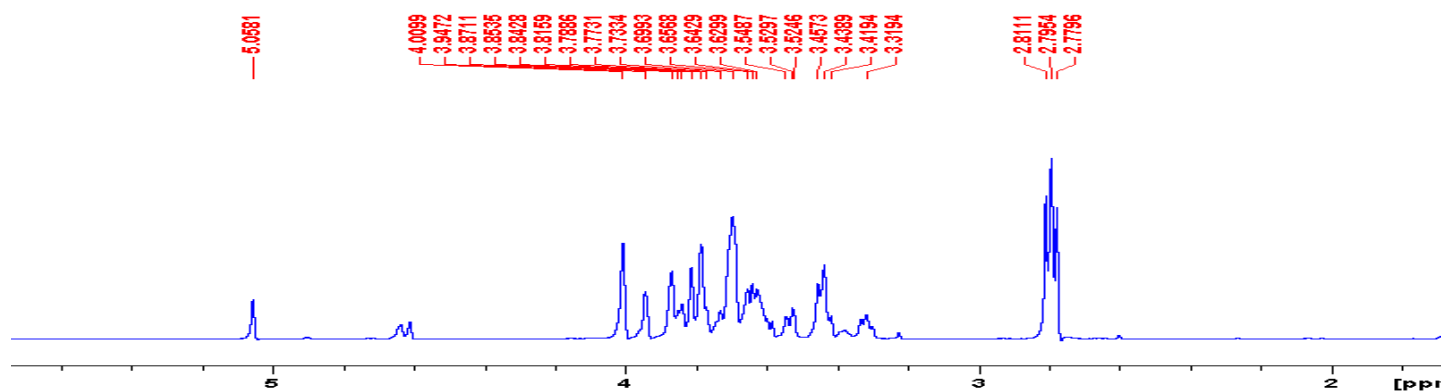

(B)

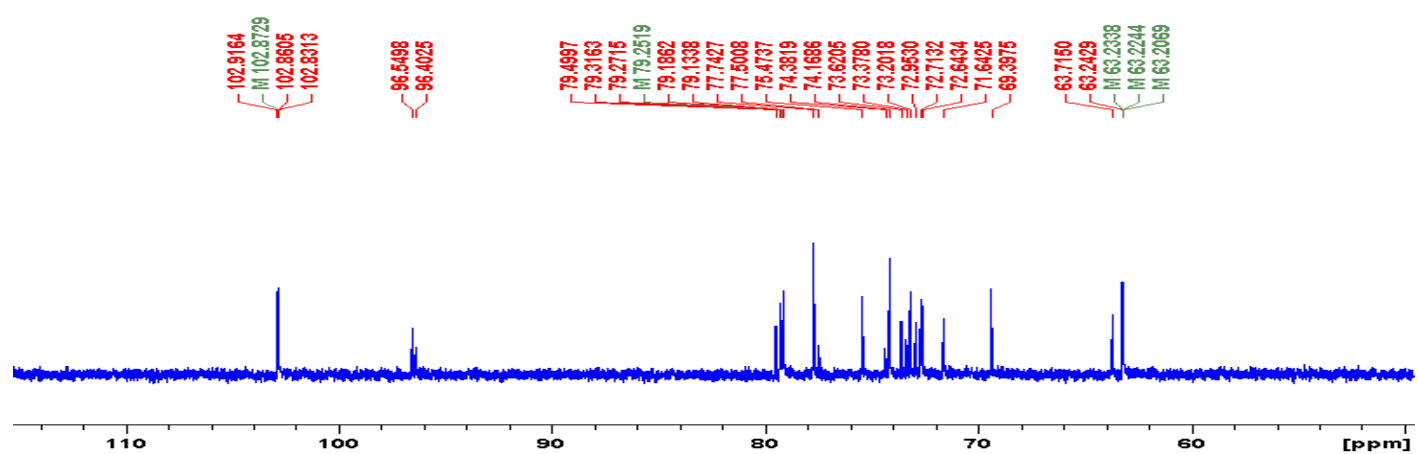

(C)

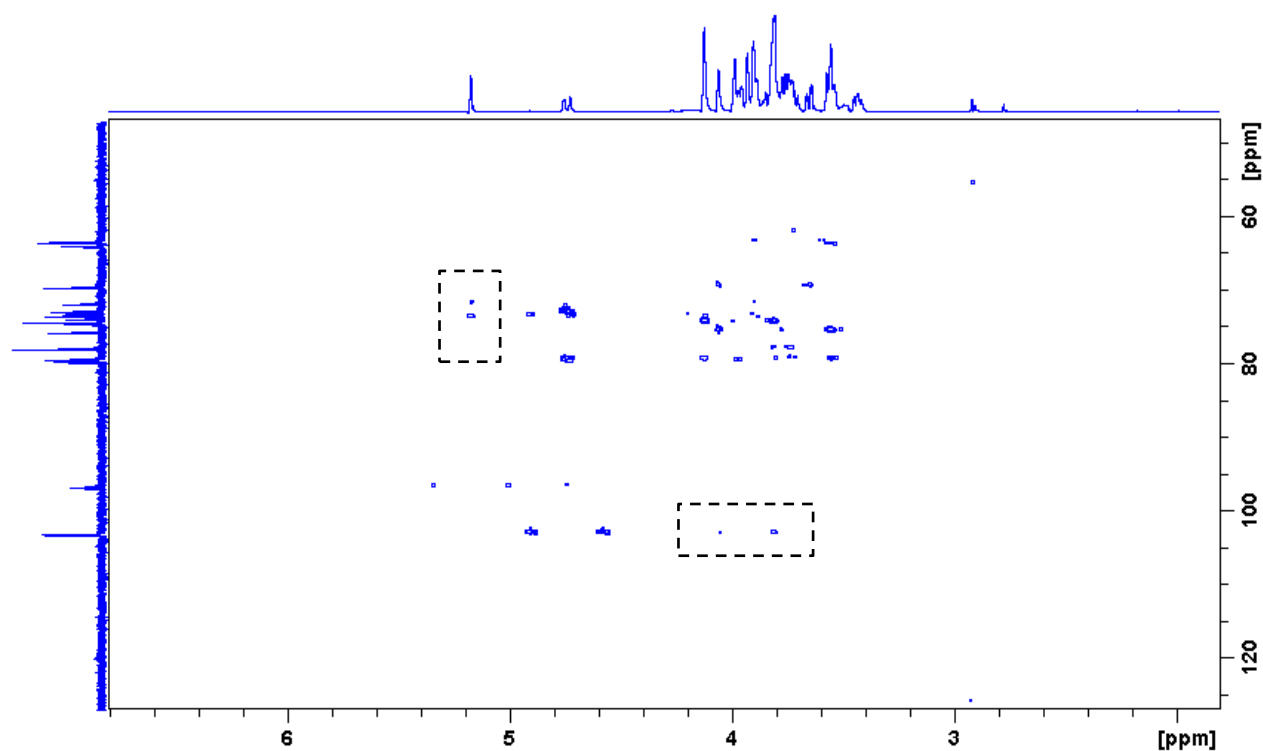

Supplement: d2fo00013j1.pdf [file d2fo00013j1.pdf]
